# Supplementary material for: T-cell calcium dynamics visualized in a ratiometric tdTomato-GCaMP6f transgenic reporter mouse
Source: eLife journal article supplement (doi:10.7554/elife.32417), 2017-12-14

**Figure 6- Figure Supplement 1**

**A** Cd4-Salsa6f (Het)

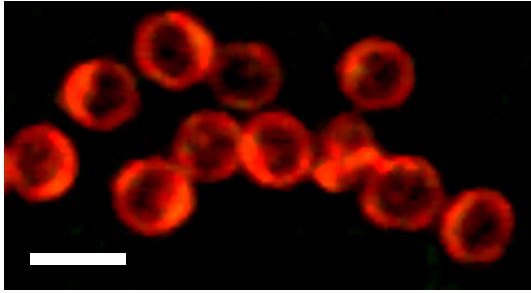

**B** Cd4-5GtdT (Het)

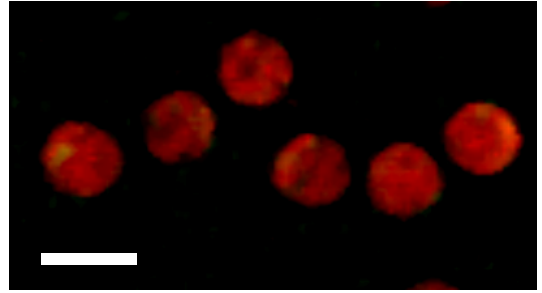

**C** 1 day activated

tdTomato

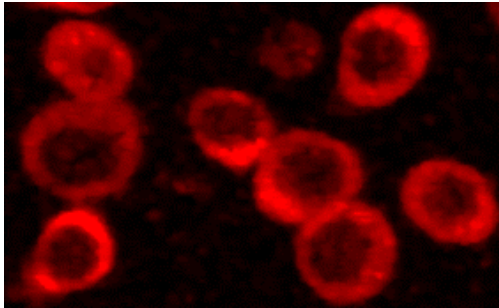

GCaMP6f

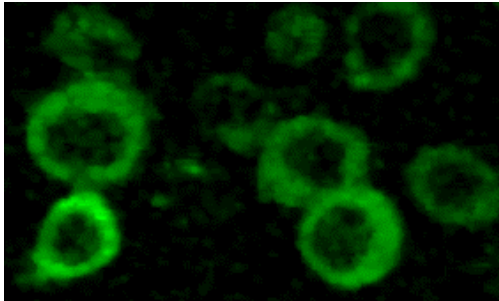

Merge

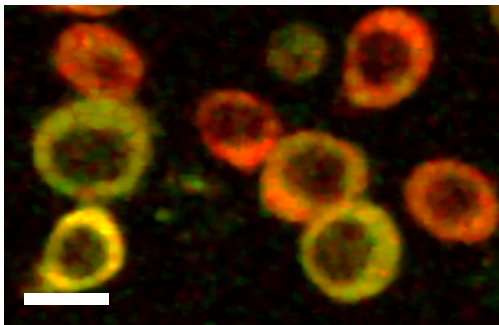

**D** 1 day activated

tdTomato

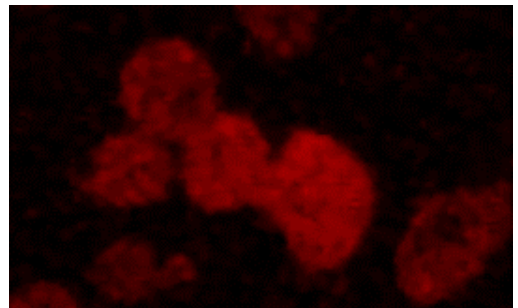

GCaMP5G

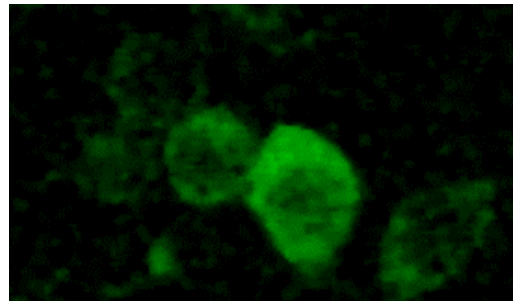

Merge

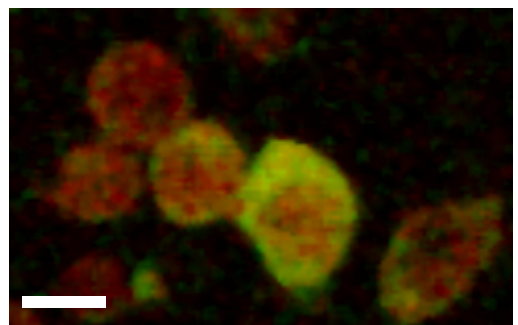

Supplement: supp [file elife_poa_e32417_Figure_6_figure_supplement_1.pdf › elife_poa_e32417_Figure_6_figure_supplement_1.pdf]
