# Supplementary figures and images for: T-cell calcium dynamics visualized in a ratiometric tdTomato-GCaMP6f transgenic reporter mouse
Source: eLife journal article supplement (doi:10.7554/elife.32417), 2017-12-14

Figure 4 - Figure supplement 1

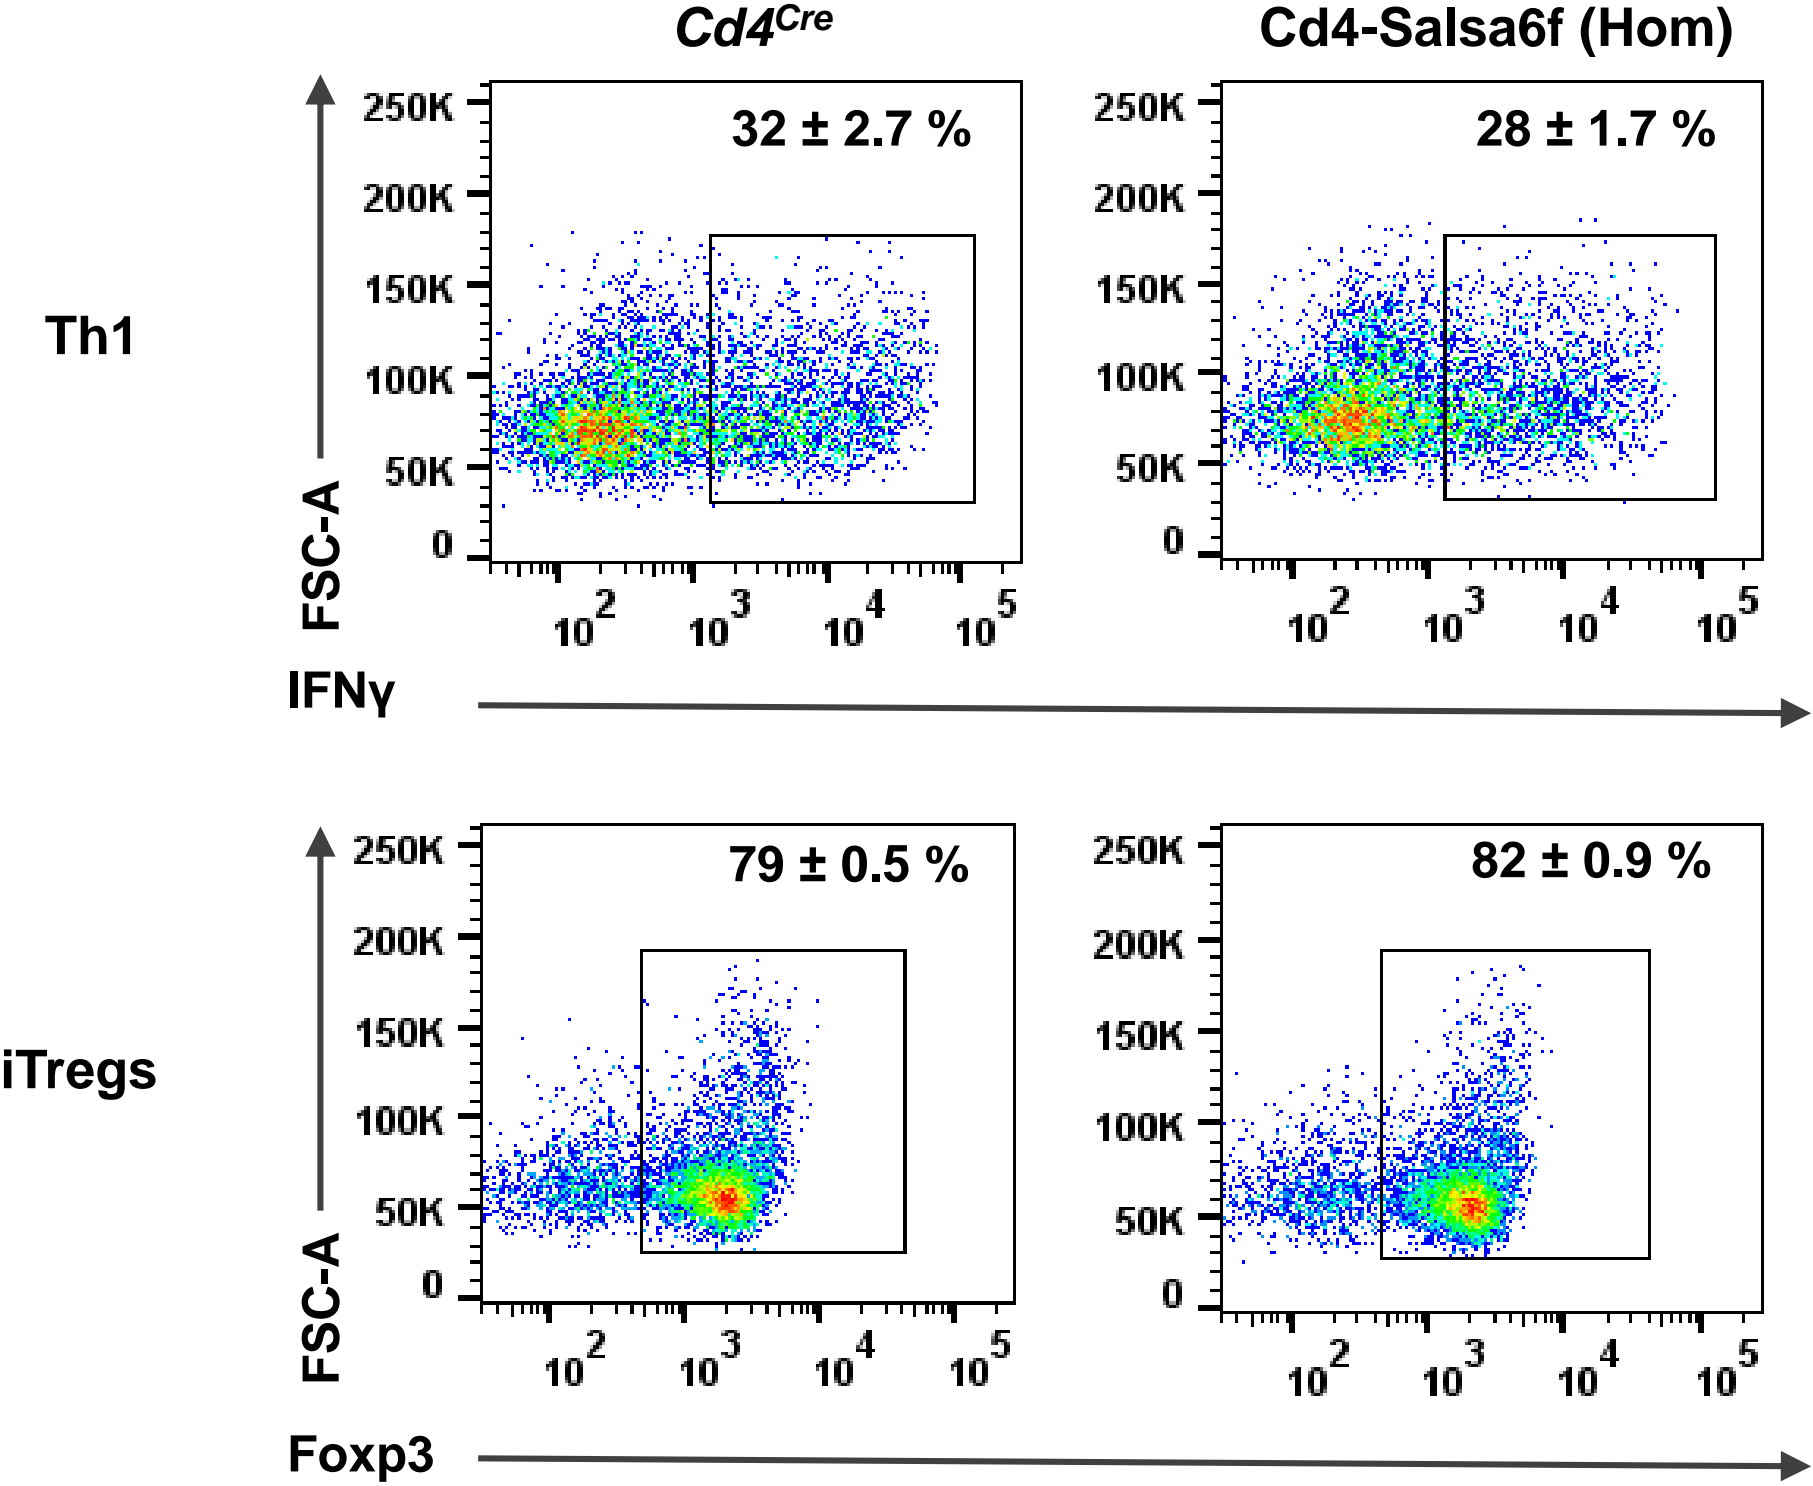

Supplement: supp [file elife_poa_e32417_Figure_4_figure_supplement_1.pdf › elife_poa_e32417_Figure_4_figure_supplement_1.pdf]

# Figure 7- Figure supplement 1

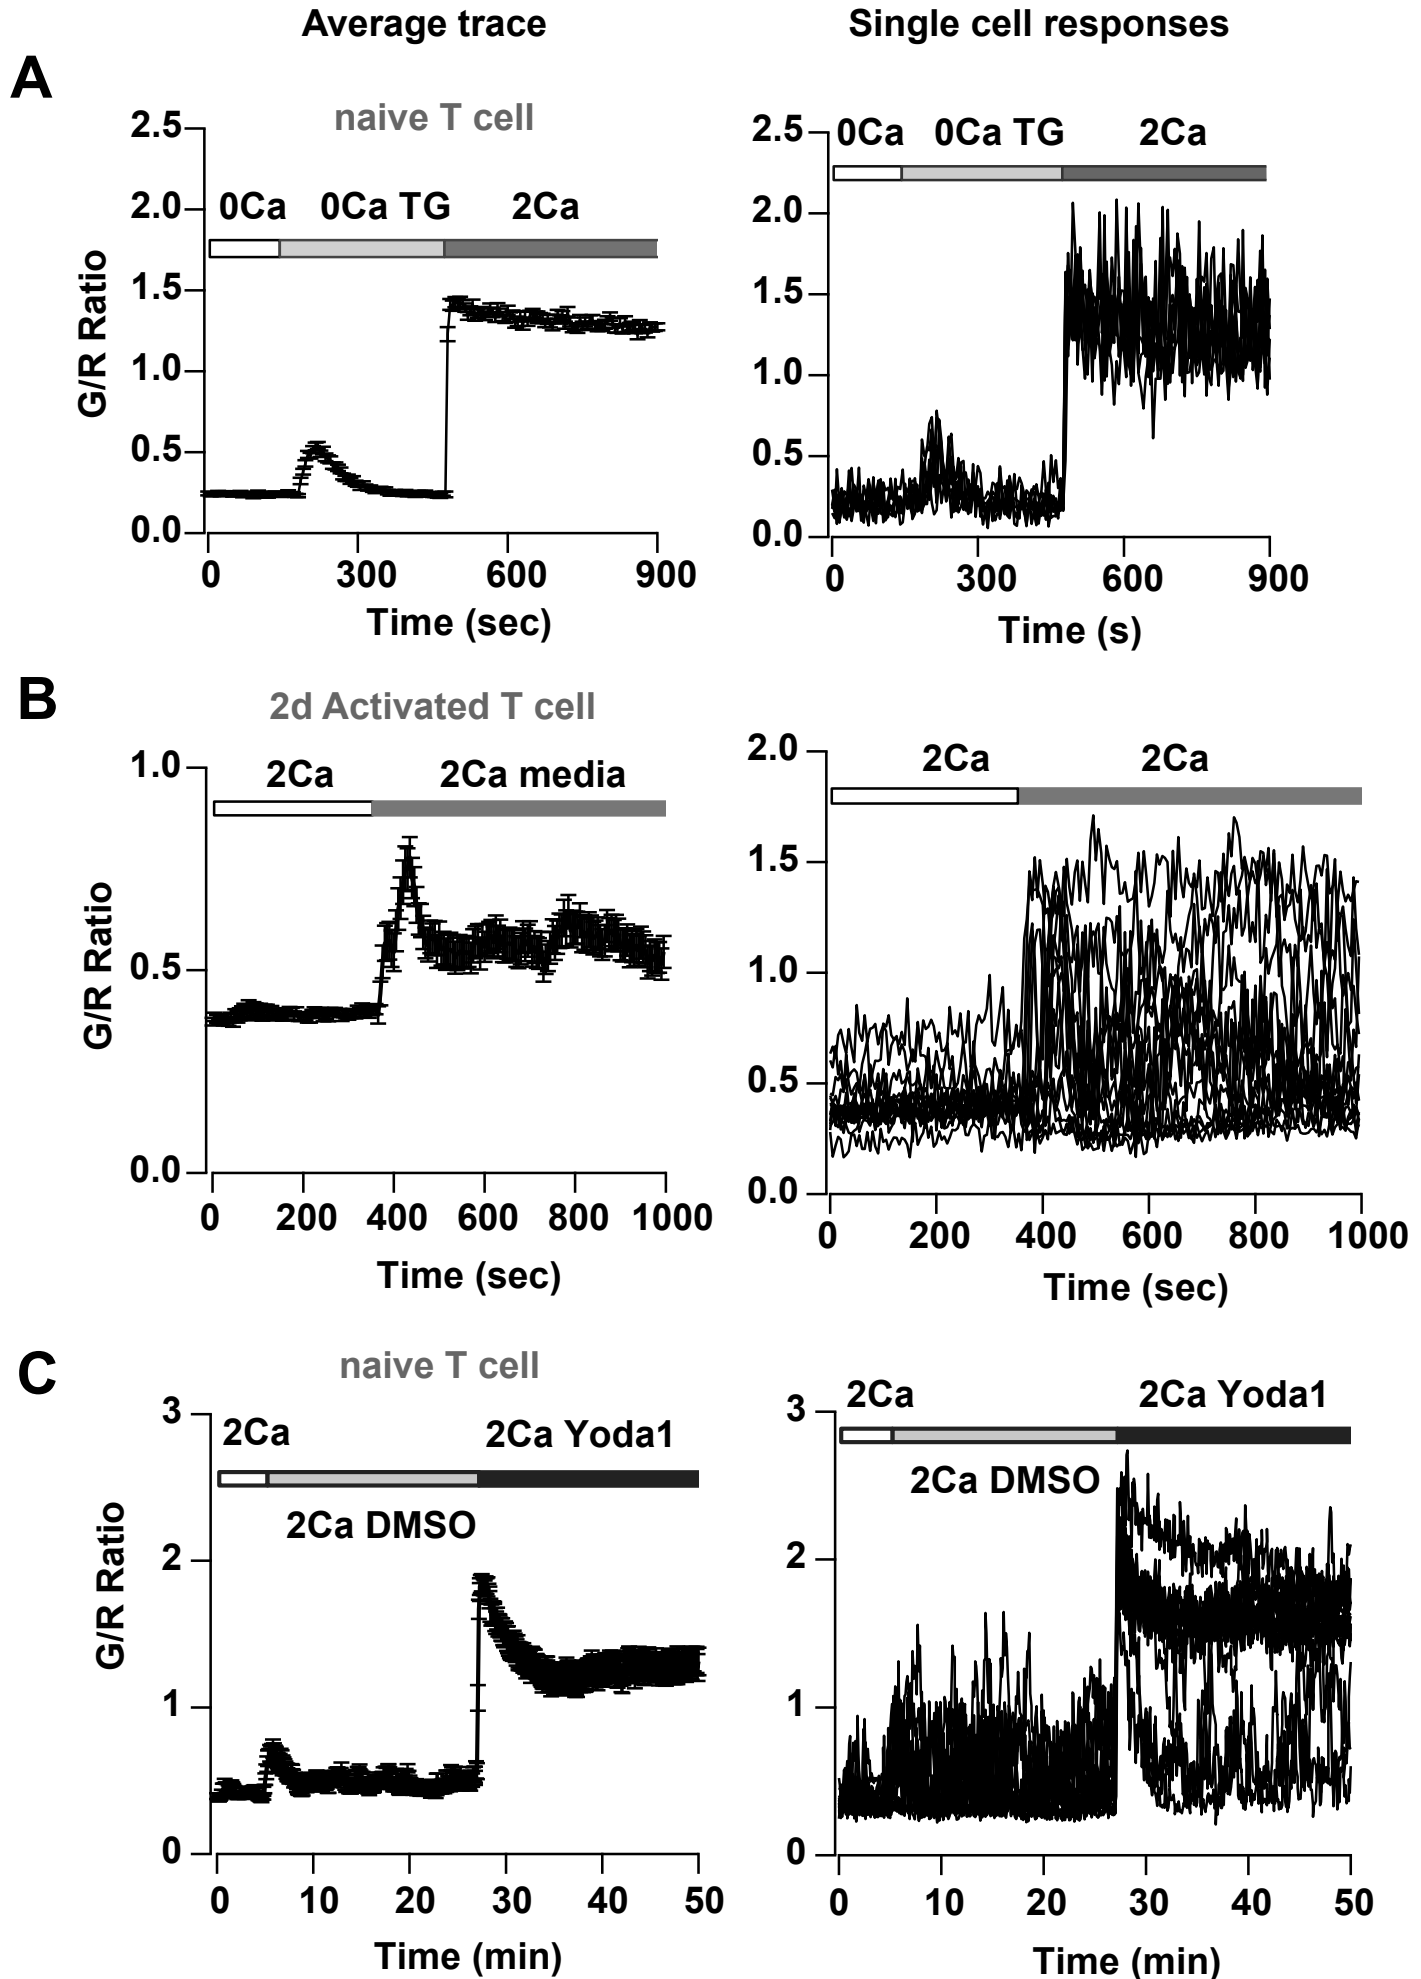

Supplement: supp [file elife_poa_e32417_Figure_7_figure_supplement_1.pdf › elife_poa_e32417_Figure_7_figure_supplement_1.pdf]

**Figure 9 - Figure supplement 1**

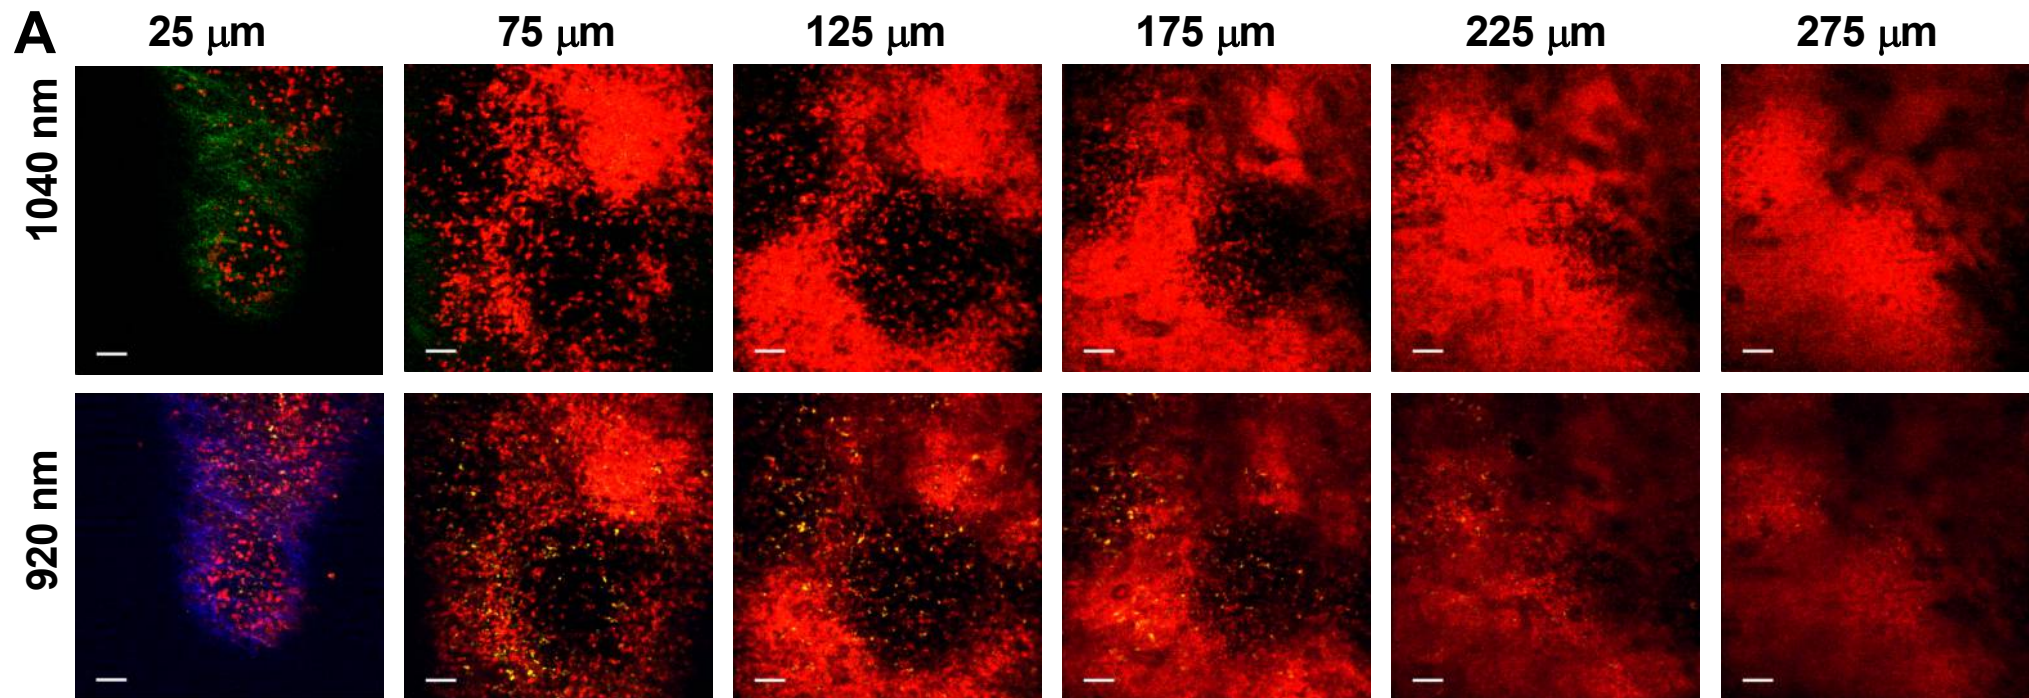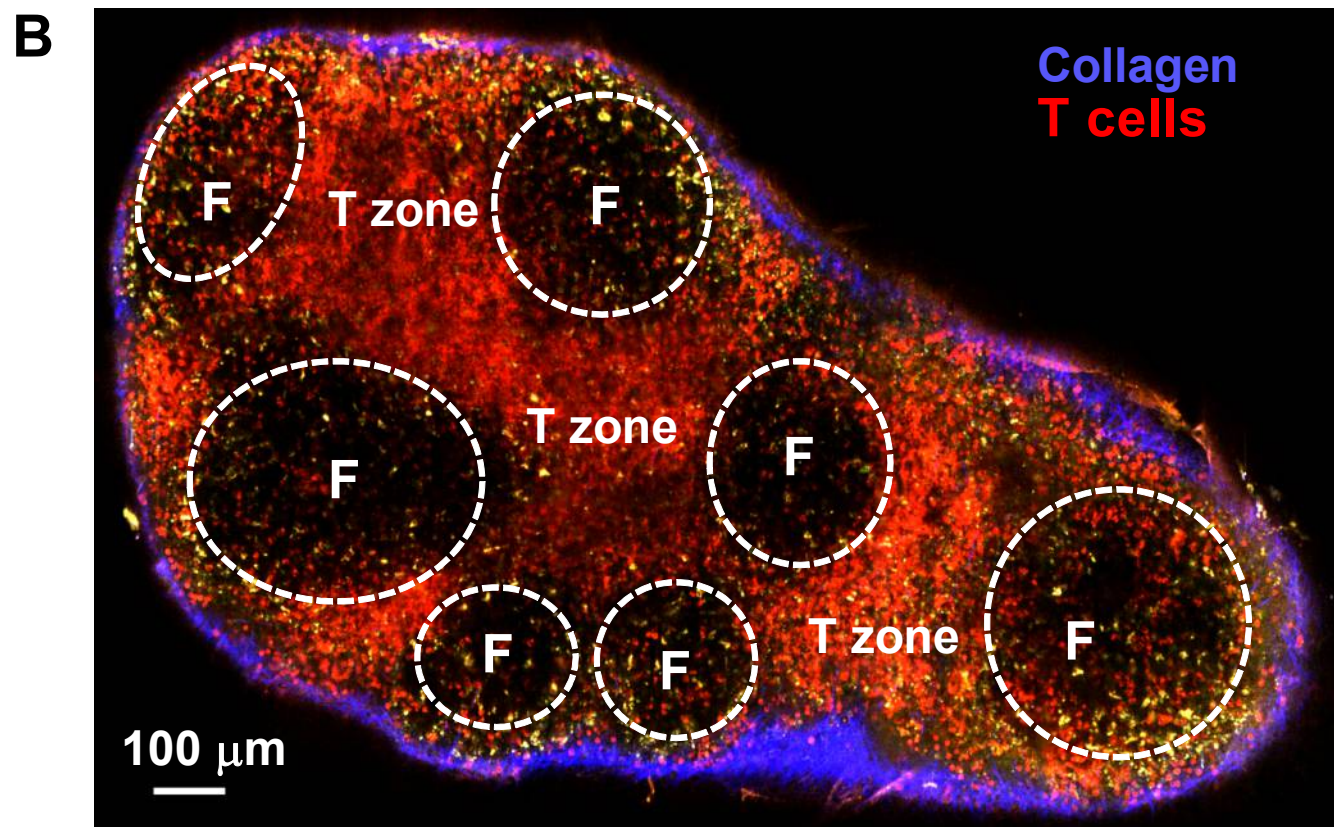

Supplement: supp [file elife_poa_e32417_Figure_9_figure_supplement_1.pdf › elife_poa_e32417_Figure_9_figure_supplement_1.pdf]

**Figure 9- Figure Supplement 2**

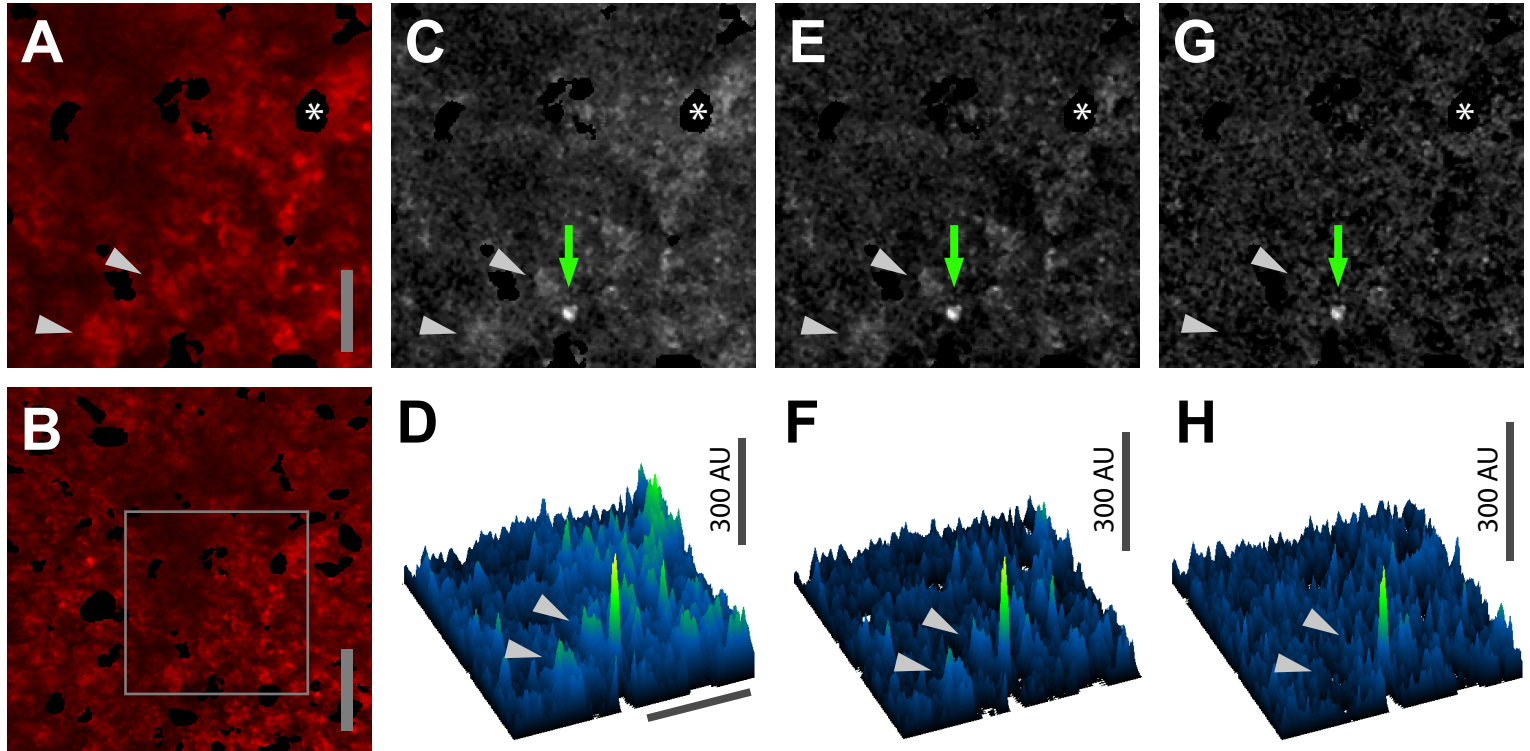

Supplement: supp [file elife_poa_e32417_Figure_9_figure_supplement_2.pdf › elife_poa_e32417_Figure_9_figure_supplement_2.pdf]
